# Supplementary material
Source: ML conference proceedings conference paper supplement (https://proceedings.mlr.press/v97/maron19a.html)
Supplement: Supplementary file [file maron19a-supp.pdf]

---

# On the Universality of Invariant Networks: Supplementary Material

---

Haggai Maron<sup>1</sup> Ethan Fetaya<sup>2</sup> Nimrod Segol<sup>1</sup> Yaron Lipman<sup>1</sup>

**Lemma 2.** *There exists a  $G$ -invariant network in the sense of definition 3 that realizes the sum of  $G$ -invariant networks  $F = \sum_{k=0}^d \sum_{j=1}^{n_k} \alpha_{kj} F^{kj}$ .*

*Proof.* We need to show that  $F = \sum_{k=0}^d \sum_{j=1}^{n_k} \alpha_{kj} F^{kj}$  can indeed be realized as a *single, unified*  $G$ -invariant network. As we already saw, each network  $F^{kj}$  has the structure

$$\mathbb{R}^n \xrightarrow{L^\tau} \mathbb{R}^{n^k \times k} \xrightarrow{M^k} \mathbb{R}^{n^k} \xrightarrow{s} \mathbb{R},$$

with a suitable  $k$ -class  $\tau$ . To create the unified  $G$ -invariant network we first lift each  $F^{kj}$  to the maximal dimension  $d$ . That is,  $\tilde{F}^{kj}$  with the structure

$$\mathbb{R}^n \xrightarrow{\tilde{L}^{kj}} \mathbb{R}^{n^d \times k} \xrightarrow{\tilde{M}^k} \mathbb{R}^{n^d} \xrightarrow{s} \mathbb{R}.$$

This is done by composing each equivariant layer  $L : \mathbb{R}^{n^k \times a} \rightarrow \mathbb{R}^{n^l \times b}$  with two linear equivariant operators  $U^b : \mathbb{R}^{n^k \times b} \rightarrow \mathbb{R}^{n^d \times b}$  and  $D^a : \mathbb{R}^{n^d \times a} \rightarrow \mathbb{R}^{n^k \times a}$ ,

$$U^b L D^a : \mathbb{R}^{n^d \times a} \rightarrow \mathbb{R}^{n^d \times b}, \quad (1)$$

where

$$U^b(x)_{i_1 \dots i_d, j} = x_{i_1 \dots i_k, j}$$

and

$$D^a(y)_{i_1 \dots i_k, j} = n^{k-d} \sum_{i_{k+1} \dots i_d=1}^n y_{i_1 \dots i_k i_{k+1} \dots i_d, j}.$$

Since  $U^b, D^a$  are equivariant,  $U^b L D^a$  in equation 1 is equivariant. Furthermore  $D^a \circ \sigma \circ U^a = \sigma$ , where  $\sigma$  is the pointwise activation function. Lastly, given two  $G$ -invariant networks with the same tensor order  $d$  they can be combined to a single  $G$ -invariant network by concatenating their features. That is, if  $L_1 : \mathbb{R}^{n^d \times a} \rightarrow \mathbb{R}^{n^d \times b}$ , and  $L_2 : \mathbb{R}^{n^d \times a'} \rightarrow \mathbb{R}^{n^d \times b'}$ , then their concatenation would yield  $L_{1,2} : \mathbb{R}^{n^d \times (a+a')} \rightarrow \mathbb{R}^{n^d \times (b+b')}$ . Applying this concatenation to all  $\tilde{F}^{kj}$  we get our unified  $G$ -invariant network.  $\square$

---

<sup>1</sup>Department of Computer Science and Applied Mathematics, Weizmann Institute of Science, Rehovot, Israel <sup>2</sup>Department of Computer Science, University of Toronto, Toronto, Canada. Correspondence to: Haggai Maron <haggai.maron@weizmann.ac.il>.

**Fixed-point equation for equivariant layers.** We have an affine operator  $L : \mathbb{R}^{n^k \times a} \rightarrow \mathbb{R}^{n^l \times b}$  satisfying

$$g^{-1} \cdot L(g \cdot \mathbf{X}) = L(\mathbf{X}), \quad (2)$$

for all  $g \in G, \mathbf{X} \in \mathbb{R}^{n^k \times a}$ . The purely linear part of  $L$  can be written using a tensor  $\mathbf{L} \in \mathbb{R}^{n^{k+l} \times a \times b}$ : Write

$$L(\mathbf{X})_{j_1 \dots j_l, j} = \sum_{i_1 \dots i_k, i} \mathbf{L}_{j_1 \dots j_l, i_1 \dots i_k, i, j} \mathbf{X}_{i_1 \dots i_k, i}.$$

Writing equation 2 using this notation gives:

$$\begin{aligned} & \sum_{i_1 \dots i_k, i} \mathbf{L}_{g(j_1) \dots g(j_l), i_1 \dots i_k, i, j} \mathbf{X}_{g^{-1}(i_1) \dots g^{-1}(i_k), i} \\ &= \sum_{i_1 \dots i_k, i} \mathbf{L}_{g(j_1) \dots g(j_l), g(i_1) \dots g(i_k), i, j} \mathbf{X}_{i_1 \dots i_k, i} \\ &= \sum_{i_1 \dots i_k, i} \mathbf{L}_{j_1 \dots j_l, i_1 \dots i_k, i, j} \mathbf{X}_{i_1 \dots i_k, i}, \end{aligned}$$

for all  $g \in G$  and  $\mathbf{X} \in \mathbb{R}^{n^k \times a}$ . This implies equation 9, namely

$$g \cdot \mathbf{L} = \mathbf{L}, \quad g \in G.$$

The constant part of  $L$  is done similarly.
